# Supplementary material
Source: publisher figshare collection journal article supplement (https://tandf.figshare.com/articles/dataset/_/21829734)
Supplement: Supplementary file 1 [file 1]

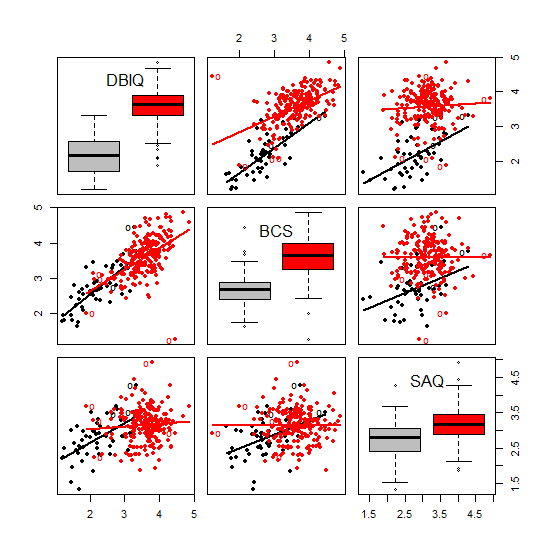


Figure 1A. Boxplots and scatterplots with regression lines for the three body experience scales DBIQ, BCS, and DKB for the trauma sample (*n* = 50, indicated by grey) and the non-clinical sample (*n* = 216, indicated by red), where the outliers (3 in the trauma group, and 5 in the non-clinical sample) are indicated by o.
